# Supplementary material
Source: PubMed Central journal article supplement (PMC3102360)
Supplement: 1014044108_pnas.201014044SI.pdf [file 1014044108_pnas.201014044SI.pdf]

# Supporting Information

Welch et al. 10.1073/pnas.1014044108

## SI Materials and Methods

**Deploying and Detecting Acoustic Tags.** Between 2004 and 2007, we tagged 3,692 juvenile salmon from four species and 20 populations in BC rivers with uniquely coded acoustic transmitters (Table S1). The tags were surgically implanted into the abdominal cavity by using established surgical procedures annually reviewed by institutional animal care committees and met or exceeded requirements specified by the Canadian Council on Animal Care. A number of studies have evaluated tag effects on survival using our methods, both of captive salmon held for 6 to 8 mo (longer than the approximate 3-mo operational lifespan of the tags used here) and of double-tagged fish released into the environment. Both types of studies showed low rates of mortality or tag loss relative to the apparent survival rates observed for free-ranging smolts (1–4).

The POST array logged detections of the ID codes transmitted by the tags; briefly, POST is a pilot or demonstration phase prototype network of receivers that is positioned in specific geometric configurations and maintained year-round for the purpose of tracking marine species. The telemetry array currently comprises approximately 400 acoustic receivers positioned in a series of subarrays that cover the distance between the shoreline and the continental shelf edge (200 m isobath) or across marine straits (Fig. 1). Receivers are also deployed in the Fraser and Columbia Rivers, and collaborators operate compatible receiver networks in Puget Sound, the Sacramento River, and various coastal estuaries, making it feasible to reconstruct migration routes of individual animals and to estimate survival rates of experimental groups of tagged animals in areas partitioned by these subarrays (5–8).

We estimated survival probabilities of tagged juvenile salmon during their migration using variants of the standard open-population, “recaptures”-only CJS mark-recapture model (9–11) to estimate survival probabilities ( $\phi$ ) in each segment of the migration and detection probabilities ( $p$ ) at each subarray the using the MARK program (as detailed later) (12).

**Detection Database Filtering.** We identified a list of suspect detections likely to be false positives if the following criteria were all observed: (i) a tag ID was detected only once on a subarray within a 30-min period; (ii) there were one or more other tags heard on the same receiver around the time of the suspect detection; and (iii) the tag ID did not have supporting detections from other time periods or subarrays. Supporting detections are defined as a chronological sequence of detections from release date along typical migration paths for each population. Only the detections whose ID codes matched up with BC salmon smolts tagged under POST were screened. The total number of detections each year on all POST subarrays for the BC salmon smolt populations presented in this study varied from 83,741 to 365,148. The number of false detections identified ranged from 43 to 343, and the resulting proportion of false detections ranged from 0.02% to 0.22%. After eliminating suspect detections, we used these filtered data to estimate the reported survival and detection probabilities, travel times and rates, and migration routes of tagged smolts.

**Mark-Recapture Model Construction.** Spatial forms of CJS models, whereby tagged animals are detected at fixed locations along a migration route rather than recaptured at fixed sampling times, are widely used for modeling survival in migrating salmon smolts (e.g., refs. 12–14). Sampling at successive subarrays occurred

over several weeks or months during the smolt migration. Multiple years of data and multiple populations from different geographical areas were combined in the same dataset so that populations of tagged fish could be linked where appropriate to compensate for small sample sizes of fish from some populations at some subarrays (15). Some subarrays were shared among all populations whereas others were specific to only some. The number and location of subarrays varied among years for some populations. Survival probabilities ( $\phi$ ) were treated as separate among populations, whereas detection probabilities ( $p$ ) were generally treated as shared among populations with similar acoustic tag types experiencing similar environmental conditions. These factors resulted in more complex models than typical CJS models, and development of these models required several steps described later. Some of these assumptions and modifications were presented previously (16), but are briefly outlined here to be comprehensive. All mark-recapture models were implemented with the MARK program, version 5.1 (17), through the R package RMark, version 1.8.8 (18).

Variations on the classic CJS model were based on several major assumptions that shaped model construction: (i)  $\phi$  in each segment was estimated independently among populations, whereas  $p$  at a subarray was pooled across populations with the same tag type; (ii) at Fraser River subarrays,  $p$  was modeled as a function of the water level at the mean time of population crossing; (iii) some populations exhibited split-route migration patterns in the Salish Sea, so extra parameters were incorporated to allow for this flexibility and reduce the bias in  $\phi$  estimates; and (iv)  $p$  on the outer subarrays (i.e., final subarrays at QCS and JDF) was predicted from  $p$  estimates on other ocean subarrays and was assumed as a fixed value to untangle the confounded  $\phi$  and  $p$  parameters in the final segment/subarray.

First, we determined the detection history of individual fish at subarrays, wherein a subarray consists of either a single receiver or multiple receivers arranged in a line. Detection histories consist of a string of ones and zeros, with a 1 representing release, then either a 1 or a 0 for all following digits, depending on whether they were detected, respectively, at successive subarrays. Tagged smolts potentially passed between two and 12 subarrays during their migration (for a maximum of 13 digits in the detection history). The number of freshwater or estuary subarrays passed during the downstream migration varied from zero (for Sakinaw Lake sockeye) to eight (for Tenderfoot Creek coho and Cheakamus steelhead in 2007). The number of ocean subarrays potentially crossed was only one (at QCS) for Nimpkish and Keogh River populations leaving freshwater north of NSOG (these fish were detected only moving northward). The number of ocean subarrays potentially crossed for populations entering the Salish Sea south of NSOG was one (JDF) or two (NSOG and QCS), depending on the direction taken. Before entering the Salish Sea, some populations potentially crossed an additional one (across Burrard Inlet) or two (in Howe Sound) ocean subarrays.

We focus our analysis on estimating the proportion of fish that survived their early ocean migration, regardless of the particular direction that fish took after ocean entry. To represent exit from the Salish Sea system, detections at the outer subarrays (QCS and JDF) were pooled in the final digit of detection history sequences. Early ocean survival was estimated as the fraction of fish entering saltwater that left the system via either northern or southern routes. Pooling outer subarrays somewhat complicates  $\phi$  and  $p$  estimates at NSOG, but this can be easily resolved (as detailed later). For fish entering the southern Salish Sea, the southern

route from the river mouth to JDF is generally shorter than to QCS, so this could confound per-distance estimates of survival (this was accounted for in estimating survival scaled by distance, by using weighted averages of the distances to each of these two subarrays, weighted by the number of fish detected at each subarray). Approximately one third of BC salmon smolt populations showed patterns of split migration routes after ocean entry (16). Fish from the other populations were detected only moving north.

Typical assumptions of open-population mark-recapture models are reviewed in detail elsewhere (12–15, 19). The most important of these include:

- Tagged animals are representative of the population of interest. Fates of individuals are independent of all other individuals with respect to  $\phi$  and  $p$ .
- Probabilities of  $\phi$  in each segment and  $p$  at each subarray are homogenous among individuals within the groups specified in the model structure.
- Sampling events (or locations) are short relative to intervals between sampling events.
- Tagged animals are not affected by tagging procedures or implanted tags.
- Tag loss or failure are negligible.
- Detected tags are in live smolts, not in predator stomachs or in dead fish floating downstream past receivers.
- All detections in a final (filtered) dataset are legitimate, not false positives.
- Smolts do not permanently reside between successive subarrays—they either die during the migration or continually migrate past subarrays. The possible state of residency is not treated explicitly for estimating survival, so actual survival is underestimated for any populations that have some fish residualizing in freshwater or residing between subarrays (like coho and chinook after ocean entry, as mentioned).

In general, survival estimators are fairly robust to the partial failure of assumptions (compared with population size, for example, refs. 15, 19).

Occasionally, tagged smolts exhibited “back-and-forth” movements among successive subarrays. This occurred in riverine, estuarine, and marine habitats. For mark-recapture analyses, this did not affect estimates of  $\phi$  or  $p$  as only a single (legitimate) detection was required to infer survival from release to that receiver subarray. For travel time and swimming speed analyses, only the first detection of a particular tag at a particular subarray was considered, i.e., the arrival times of each fish at each successive subarray.

**Survival and Detection Probability Submodels.** Sample sizes of tagged fish and survival during the migration varied among populations, so the number of fish from each population detected at a receiver subarray varied widely. Many populations had few detections on some subarrays, and mark-recapture estimates of  $\phi$  ( $\hat{\phi}$ ) or  $p$  ( $\hat{p}$ ) would not have been reliable for these populations if separate CJS models were constructed for each population in each year (16). Instead, we combined all data into two large models, but maintained independence among populations in terms of survival, so segment-specific  $\phi$  varied freely between groups, i.e.,  $\phi_{\text{Segment:Group}}$ , where “Group” is a unique combination of species, population, hatchery or wild-reared provenance, and year. Main effects of segment and group per se were not of interest, especially as the  $n$ th segments of different groups were often in different geographic locations.

Detection probabilities were modeled as station-specific, year-specific and, in some models considered, tag type-specific, as V9 tags (142 dB re 1  $\mu$ Pa at 1 m) are louder and can be detected from further away than V7 tags (136 dB). In these models, we assume that a particular tag type from one population should

have the same probability of being detected at the same subarray in the same year as the same tag type from a different population (unless environmental conditions differ markedly among the run timing periods of populations, as detailed later). We also constrained the relative difference in  $\hat{p}$  between tag types to be additive (i.e., constant in logit space) across years and subarrays. Two datasets were constructed, one for Fraser River watershed populations and the second for all other populations, each containing data from 2004 to 2007. (With the number of populations and detection occasions considered, numerical estimation using a single combined dataset proved to be computationally infeasible.) Separation of the two datasets meant the relative difference in  $\hat{p}$  between tag types could be inconsistent between datasets, although it turned out to be similar. Essentially, separate CJS models were constructed for each species, population, provenance, and year combination in terms of  $\phi$ , but  $p$  for a given subarray, tag type, and year were shared across these groups.

Tagged salmon smolts originated from diverse locations in southern BC (Fig. 1). Along the migration route of a population, some subarrays were shared with other populations and some were unique. To analyze multiple populations and years together in the same model required appropriately pairing the detection history digit for each population with those from other populations. For example, Tenderfoot Creek coho smolts in 2007 had a 13-digit detection history. The final digit of this sequence represents detection at QCS or JDF; to combine populations in the same model, all other populations must also have QCS/JDF as their 13th digit, as this subarray is common to all populations. For populations with fewer than 13 digits in their detection history, this means the detection history must begin with an appropriate number of zeros before the first 1 representing release (15).

In some cases, particular subarrays at a given digit of the detection history were not common to all populations. This was not an issue for the Fraser River dataset, as, at least within each year, all populations shared the same subarrays along migratory routes. For the non-Fraser dataset, having different subarrays represented at a given digit was dealt with by incorporating extra parameters to represent the interaction of subarrays, years, and general migration route clusters (16). These parameters were additive components of all  $p$  submodels. They ensured that  $\hat{p}$  were common for populations with the same tag type at some subarray in some year, but were separate for populations with migration routes that brought them past different subarrays at the same given detection history digit. Eleven such parameters were required to specify these distinctions over all subarrays, years, and populations outside of the Fraser River.

We estimated a variance inflation factor ( $c$ ) to compensate for overdispersion in estimated parameters (12). This factor was used to expand SEs of real parameter estimates and values in the variance-covariance matrix. Estimated  $c$  values were also used for model comparisons, with computed QAICc values corrected for both extrabinomial variation [“Q” (for quasi-) correction on Akaike’s Information Criterion (AIC); ref. 15] and small sample sizes (“c” correction on AIC; ref. 20). We estimated  $c$  assuming the general CJS model ( $\phi_{\text{Segment} \times (\text{Group:TagType})}, p_{\text{Station} \times (\text{Group:TagType})}$ ). We used two bootstrapping methods in the MARK program. The deviance ratio method ( $\hat{c} = 1.400$  for the Fraser River dataset and 1.177 for the non-Fraser dataset) proved to be more conservative on average than the  $\hat{c}$  ratio method ( $\hat{c} = 1.387$  for the Fraser River dataset and 1.013 for the non-Fraser dataset), so the larger estimates were used. Separation of the two datasets allowed for separate  $\hat{c}$  to be applied to each dataset rather than a single common value (which would be approximately  $\hat{c} = 1.245$  using the deviance ratio method).

The product of segment-specific  $\hat{\phi}$  during either the downstream or early ocean migration of each population was calculated as an estimate of total downstream or early ocean survival,

respectively. The variances of these products were calculated using the Delta method.

**Environmental Covariates on Fraser River Detection Probabilities.** Detection probability of tags passing subarrays depends on background noise and therefore on environmental conditions. In rivers, water level often increases during late spring as a result of snow melt. Higher water levels result in (i) faster flow, so that, on average, tags are within range of a receiver for a shorter period, and (ii) greater noise. Both factors may act to decrease  $p$  during greater flow periods, which in southern BC tend to occur later in the migratory season. In the Fraser River, multiple populations were tagged and released at varying times throughout the migratory season (16), so this potential effect was taken into account for some candidate models of  $p$ .

The effect of different release times or flows on  $p$  can be observed by initially treating populations independently. Fig. S1 shows fully independent  $\hat{p}$  for all Fraser River populations, i.e., model  $\phi_{\text{Segment:Group}} \cdot p_{\text{Station:Group:TagType}}$ , where Group represents unique combinations of species, population, and year. The number and locations of subarrays in the Fraser River varied among years, so the first subarray encountered in one year is not necessarily the same as the first subarray in another year. Estimates of  $p$  for a particular population and tag type are plotted against the water level measured at the mean arrival time of that population at a particular subarray. On average, and within each tag type, these population-specific  $\hat{p}$  values decrease as river level increases during the migration season. This is especially apparent in 2005 and 2006 when there were many fish groups released over a wide range of dates and therefore water levels. Generally, the later-migrating populations experienced greater flow during the downstream migration and their  $\hat{p}$  estimates were lower. At a given water level,  $\hat{p}$  was generally higher for V9 tags than for V7 tags.

Modeling  $p$  as fully independent among populations resulted in small  $p$  sample sizes detected at and after river subarrays for several populations, so many of these  $\hat{p}$  were imprecise and susceptible to over-fitting. At the other extreme, fully pooling all populations at a given subarray in a given year would result in a single, average  $\hat{p}$  so would not capture any seasonal trend (16). To find a good balance in this tradeoff between bias and precision, models incorporating an environmental covariate were considered. These submodels accounted for seasonal variation in  $p$  by constraining  $p$  to be a linear function (in logit space) of one or more covariates at the appropriate mean run timing of each group. One model used the day of year (DOY) of mean arrival at a detection subarray. Daily water level data from two Environment Canada gauge subarrays in the lower Fraser River (at Mission and Port Mann) were matched to the DOY of mean arrival time at each receiver subarray; these provided two other models. A fourth model incorporated both water level covariates, with the measure for each subarray taken from a combination of both gauges. (The Mission gauge was closest to the first subarray in 2004 and 2007, but to avoid over-fitting to only two subarrays, the water level at Mission was used as a covariate for all subarrays and years. In addition to this, the water level at Port Mann was used as another additive covariate at all later river subarrays in all years.) This fourth model was hypothesized because  $p$  at Mission subarrays likely correlates best with the Mission water level, but increased inflow from tributaries and increased industrial activity downstream of this subarray are such that  $p$  at subarrays further downstream may correlate better with water level at the Port Mann gauge, further downstream. These covariate effects were additive: slopes of  $p$  versus DOY or water level were assumed to be constant across years, subarrays, and tag types, but the intercepts were permitted to vary for year/subarray combinations and for each tag type. Along with maintaining a consistent relative difference in  $p$  between V7 and V9

tags, this was a second reason for grouping together all 4 y in the Fraser River dataset.

Run timing and river flow may affect  $p$  in other rivers as well, but no other river studied had such a wide range of release dates among populations, so there was little opportunity to quantify a trend in  $p$ . In these other rivers,  $\hat{p}$  were allowed to vary among subarray and year combinations, but were constrained to be common for populations sharing the same tag type. Even if run timing or flow effects on  $p$  were as pronounced in these smaller rivers as they were in the Fraser, the difference in release dates among these populations was much smaller, so any difference in  $p$  would likely be minor, further justifying the pooling of populations.

**Correction of Biases in Survival Probabilities from Split-Route Migration Patterns.** Spatial forms of CJS models (release and subsequent detection at successive fixed locations along a migration route) are unlike temporal forms (at fixed times) in that migration routes may not be continual in a single path. Migration routes may split and fail to rejoin before the next detection subarray (13, 21). This occurred in approximately one third of populations that entered the Salish Sea south of NSOG, with some fish migrating south over JDF whereas others migrated north over NSOG and QCS. If fish migrated directly south and were detected at JDF, there was no opportunity to have been detected at the next-to-last subarray, as an equivalent subarray to NSOG did not exist along the southern route. If forks of this split-route pattern are pooled together (for estimating overall early ocean survival regardless of direction taken), this leads to biases in  $\hat{\phi}_{\text{River mouth} \rightarrow \text{NSOG}}$  and  $\hat{p}_{\text{NSOG}}$  in CJS models, with the bias worsening as the proportion of fish migrating south increases (16). Methods have been developed to account for split-route migration patterns in similar situations (21), but in the present models with multiple interrelated release groups crossing variable numbers and locations of subarrays, specifying the likelihoods manually can be prohibitive as they become largely intractable.

To correct the bias in  $\hat{\phi}_{\text{River mouth} \rightarrow \text{NSOG}}$ , some candidate models incorporated extra terms for  $p$  at NSOG (16). Any group (i.e., combination of species, population, provenance, and year) that exhibited some degree of southward movement after entry into the Salish Sea (as evidenced by detection at JDF) was given a single, freely varying parameter that represented  $p$  at NSOG for that group in particular. (All other groups detected only moving northwards shared a common  $\hat{p}_{\text{NSOG}}$ .) The group-specific  $\hat{p}_{\text{NSOG}}$  values were not detection probabilities per se, but joint probabilities of northward migration and detection. Use of these extra parameters resulted in unbiased  $\hat{\phi}$  in ocean segments. There were seven such groups in the Fraser River dataset and nine groups in the non-Fraser dataset that exhibited some degree of southward movement and had extra parameters associated with them in the candidate models that incorporated this flexibility.

**Assumptions of Detection Probability at Final Subarrays.** There is no information after a final detection subarray with which to separate the confounded parameters of  $\hat{\phi}$  in the final segment and  $p$  at the final subarray, unless a value is assumed for one or the other. Because of the cost and resulting limited ocean detection subarrays and the importance of the final segment (in some cases, the only ocean segment) to our inferences of early ocean survival, we assumed a fixed value for  $p_{\text{final}}$  to estimate  $\hat{\phi}_{\text{final}}$ . This assumption carries the risk of misestimating  $\hat{\phi}_{\text{final}}$  if the fixed value of  $p_{\text{final}}$  is incorrect. Determining values of  $p_{\text{final}}$  to assume as fixed involved two main steps (i): accurately estimating  $p$  on other ocean subarrays and (ii) using these values to predict  $p$  for the outer ocean subarrays, adjusting for slight differences in line geometry. Because of the risk involved with this approach, we

evaluated the sensitivity of early ocean survival estimates to values assumed for  $p_{\text{final}}$ .

**Isolated detection probability analysis on NSOG and HS subarrays.** To estimate  $p$  on inner ocean subarrays (NSOG, HS<sub>in</sub>, HS<sub>out</sub>) as accurately as possible, we constructed a shortened detection history of tags with digits for release, the subarray(s) of interest, and detection anywhere downstream of the subarray of interest. To estimate  $p_{\text{NSOG}}$ , populations that originated south of NSOG and migrated north were included in a three-digit dataset (detections at JDF were not paired with QCS in this case, to avoid confounding  $p_{\text{NSOG}}$  with the probability of southward movement after entering the Salish Sea). To estimate  $p_{\text{HSinner}}$  and  $p_{\text{HSouter}}$ , populations that originated from the Squamish River watershed were included in a four-digit dataset. These shortened detection history versions reduced the dependence of  $\hat{p}$  and uncertainty in  $\hat{p}$  on parameters from other segments and subarrays. For each of these datasets, several candidate submodels for  $p$  were considered, whereas the  $\phi$  submodel assumed full independence between segments and groups (including tag type) to be as flexible as possible ( $\phi_{\text{Segment} \times (\text{Group} \cdot \text{TagType})}$ ). All submodels for  $p$  assumed full independence between subarray and year. The best  $p$  submodel overall in terms of Akaike Information Criterion (AIC) scores assumed an additive difference between V7 and V9 tags with species and populations pooled together ( $p_{\text{Station} \times \text{Year} + \text{TagType}}$ ; Table S2; Fig. S2). All models involving group-specific  $p$  required many extra parameters to be estimated but did not gain enough improvement in the goodness of fit to compensate, so had less support in the data. There was no evidence of a consistent seasonal trend in  $p$  at these three ocean subarrays (unlike the situation in the Fraser River) despite run timing periods being widespread among populations crossing NSOG, so pooling of species and populations was further justified. Only tags with a random delay of 30 to 90 s were included in the analysis, as the delay between transmissions should affect  $p$  in theory.

The sample size of V7 tags detected at and downstream of NSOG was insufficient to estimate  $p_{\text{V7,NSOG}}$ , even when all years were pooled (this is why the effect of tag type was less important at NSOG in Table S2). We assumed that the relative difference in  $p$  between V7 and V9 tags (i.e., the intercept difference between parallel slopes in logit space) assessed on HS subarrays from the other dataset also held for the NSOG subarray. A simple regression between  $\hat{p}_{\text{V7,HS,year}}$  and  $\hat{p}_{\text{V9,HS,year}}$  was performed in logit space. The regression slope and intercept parameters were used to infer reasonable values of  $\text{logit}(\hat{p}_{\text{V7,HS,year}})$  from  $\text{logit}(\hat{p}_{\text{V9,HS,year}})$ , after which values were back-transformed to the probability scale. Isolated  $\hat{p}$  for these receiver subarrays, tag types, and years are shown in Fig. S24.

**Predicting detection probability on QCS and JDF subarrays.** We cannot estimate  $p$  at final subarrays QCS and JDF with mark-recapture methods, but we assume that they are similar to  $\hat{p}_{\text{NSOG}}$ . These three receiver subarrays experience similar oceanographic conditions and are deployed at similar depths, so we expect a similar probability of detecting a tag as it crosses the subarray. Nevertheless, these receiver subarrays do differ slightly in terms of geometry, or the average spacing between receivers and the proportion of receivers successfully recovered, so we accounted for these differences in making predictions of  $p_{\text{QCS}}$  and  $p_{\text{JDF}}$ .

Using  $\hat{p}_{\text{NSOG}}$ ,  $\hat{p}_{\text{HSinner}}$ , and  $\hat{p}_{\text{HSouter}}$  for each of the two tag types derived from the isolated  $p$  analysis, we used multiple regression to model  $\hat{p}$  as a function of one or more subarray geometry covariates. These covariates included mean horizontal spacing between receivers on a subarray, mean deployment depth, the proportion of receivers recovered and successfully downloaded, and the proportion of coverage on a subarray under an assumed value of receiver detection range. (For example, if a detection range of 400 m is assumed for all receivers on a subarray, what fraction of the one-dimensional receiver subarray is covered by the radius of at least one receiver?) Detection

ranges of 300, 350, 400, 450, 500, and 550 m were considered for these “proportion of coverage” covariates, with larger assumed detection ranges (e.g., 450–550 m) implying greater coverage on the subarray, and smaller assumed detection ranges (e.g., 300–350 m) implying a smaller proportion of coverage across the entire subarray (16). These “coverage” covariates combined effects of average spacing between receivers and proportion of successfully recovered receivers. Tag type was incorporated as an additive covariate in all candidate models. In some models, we also considered a main effect for receiver subarray, hypothesizing that possible differences in local noise conditions among subarrays could result in overall differences in  $p$ .

For each tag type and year,  $\hat{p}_{\text{NSOG}}$ ,  $\hat{p}_{\text{HSinner}}$ , and  $\hat{p}_{\text{HSouter}}$  were logit-transformed for the regression. The candidate regression models were ranked in terms of AIC and adjusted  $r^2$  values (not shown). The best model overall involved a covariate of proportion of coverage assuming a detection range of 400 m, i.e.,  $\hat{p} \sim \text{TagType} + \text{cover}_{400}$  (adjusted  $r^2$  values of 0.28 for V9 tags and 0.23 for V7 tags when regressed separately). A similar model containing an additive “line” effect had less support in the data ( $\Delta\text{AIC} = 2.9$ ), but did admit more uncertainty in the predictions. To be more conservative, we assumed this model,  $\hat{p} \sim \text{TagType} + \text{line} + \text{cover}_{400}$ , for predicting  $p_{\text{QCS}}$  and  $p_{\text{JDF}}$  even through the line effect was weak. This simply suggests that after accounting for variation in  $\hat{p}$  due to  $\text{cover}_{400}$ , there was little further explanatory power in a geographical effect, which strengthens our assertion that  $p_{\text{QCS}}$  and  $p_{\text{JDF}}$  can be reasonably predicted from  $\hat{p}$  at subarrays in other geographic areas. The  $\text{cover}_{400}$  effect allowed for  $p_{\text{QCS}}$  and  $p_{\text{JDF}}$  predictions to be specific to those outer subarrays by using their specific  $\text{cover}_{400}$  covariate values in the regression relationship established for the other subarrays. The line effect value for NSOG was assumed for QCS and JDF, i.e.,  $\hat{p}_{\text{QCS}} \sim \text{TagType} + \text{line}_{\text{NSOG}} + \text{cover}_{400,\text{QCS}}$ . Values of  $\text{logit}(\hat{p}_{\text{QCS}})$  and  $\text{logit}(\hat{p}_{\text{JDF}})$  were generated for each year and tag type because subarray geometry varied slightly from year to year, and then back-transformed to the probability scale.

Uncertainty for predicted of  $p_{\text{QCS}}$  and  $p_{\text{JDF}}$  values was approximated, comprised of two sources that were assumed to be independent (i): the maximum of yearly  $\text{SE}(\hat{p}_{\text{NSOG}})$  using the reduced-digit CJS model (i.e., uncertainty in  $\hat{p}$  caused by binomial probabilities at limited sample sizes and uncertainty in survival, assumed to be similar among NSOG, QCS, and JDF subarrays); and (ii) uncertainty in  $p_{\text{QCS}}$  and  $p_{\text{JDF}}$  predictions associated with the regression against  $\text{cover}_{400}$  (i.e., uncertainty in  $\hat{p}$  caused by differences in line geometry among lines and years). The 95% confidence limits for the first component were estimated with profile likelihoods in logit space by using MARK. The largest of the resulting variances over the 4 y (range, 0.153–0.194 in logit space) was used to be conservative. For the second (and usually smaller) component,  $\text{SE}(\hat{p}_{\text{QCS}})$  and  $\text{SE}(\hat{p}_{\text{JDF}})$  from the regression were computed in logit space. The resulting variance was added to that of the first component, assuming independence of variance components. The combined variance was used to calculate combined 95% confidence limits on the logit scale, which were back-transformed to the probability scale.

Detections on QCS and JDF were pooled in the final digit of the detection history to represent exit from the Salish Sea system, so a combined prediction of  $p$ ,  $\hat{p}_{\text{QCS/JDF}}$ , is required for these outer subarrays. A weighted mean of  $\hat{p}_{\text{QCS}}$  and  $\hat{p}_{\text{JDF}}$  for each year and tag type was taken, weighted by the estimated number of tags crossing these two subarrays (the number of tags detected on a subarray divided by  $\hat{p}$  for that subarray, year, and tag type). The same approach was used for combined estimates of upper and lower 95% confidence limits of  $\hat{p}_{\text{QCS/JDF}}$ . Predictions of  $p$  for both outer subarrays as well as their combined estimate are shown in Fig. S2B.

To quantify the uncertainty in early ocean survival estimates associated with assuming a fixed value for  $p_{\text{QCS/JDF}}$ , the un-

certainty of this final  $\hat{p}$  was taken into account. Mark-recapture models were fit to detection data for both Fraser and non-Fraser datasets, but rather than assuming only  $\hat{p}_{\text{OCS/JDF}}$ , the approximate 95% confidence limits of  $\hat{p}_{\text{OCS/JDF}}$  were also assumed as fixed values. Fixing  $\hat{p}_{\text{final}}$  to the upper 95% confidence limit results in a lower  $\hat{\phi}_{\text{final}}$ , and fixing  $\hat{p}_{\text{final}}$  to the lower 95% confidence limit results in a higher  $\hat{\phi}_{\text{final}}$  of all groups. This bounded a range of uncertainty for  $\hat{\phi}_{\text{final}}$  and thus for the total early ocean survival estimate. This error is additional to the mark-recapture error estimated with fixed values of  $\hat{p}_{\text{OCS/JDF}}$  at the final subarrays; both types of error are presented in Fig. 3.

**List of Candidate Models.** The objective of this study was to quantify survival estimates of smolt populations as reliably as possible (i.e., balancing accuracy and precision; avoiding under-fitting or over-fitting). Attributing variation in survival to any factors in particular is beyond the scope of this paper. The same, general submodel for  $\phi$  was therefore assumed across candidate models in both datasets,  $\phi_{\text{Segment:Group}}$ , where Group is a unique combination of species, population, provenance, and year. This allowed for separate  $\phi$  in each segment of the migration for each group.

Submodels of  $p$  allowed for separate estimates for each particular detection subarray and year combination,  $p_{\text{Station:Year}}$ , and most submodels involved additional parameters that increased the flexibility of  $\hat{p}$ . In all models, tags of the same acoustic output crossing a particular receiver subarray around the same time were assumed to have a common  $p$  even if they were implanted into smolts from different populations (16); noting that the use of population-specific covariates for constraining  $\hat{p}$  at Fraser River subarrays is a partial exception to this). In some models,  $\hat{p}_{\text{V7}}$  and  $\hat{p}_{\text{V9}}$  were allowed to differ (consistently across subarrays and years), and in other more constrained models, a common  $\hat{p}$  was assumed with tag types pooled. Some models corrected the bias of  $\hat{p}$  and  $\hat{\phi}$  as a result of split-route migration patterns by allowing for additional parameters in  $p$  submodels, which represented population-specific joint estimates of movement and detection at NSOG. Other models did not incorporate these parameters. In the Fraser River dataset, various run timing or river flow covariates were used to characterize seasonal changes in  $p$ . Finally, in all models,  $p_{\text{final}}$  was fixed at a value derived from the isolated analysis of  $p$  on ocean receiver subarrays, adjusting for geometrical properties of individual receiver subarrays. Fixing this parameter untangled the confounded  $\hat{\phi}_{\text{final}}$ , allowing it to be estimable but conditioned on the fixed value assumed for  $p_{\text{final}}$ .

The number of candidate models considered follows from these inclusions or exclusions of additional parameters for  $p$ . In the Fraser River dataset, there were two possibilities for tag type (pooled or distinct), two possibilities for split-route bias-correction parameters (included or not), and five possibilities for environmental covariates during mean arrival time at subarrays (DOY, Mission water level, Port Mann water level, water level from both gauges at specific subarrays, and none), whose product totaled 20 candidate models. In the non-Fraser dataset, there were two possibilities for tag type and two possibilities for split-route bias-correction parameters, giving four candidate models.

**Mark-Recapture Model Selection Results.** Several models for detection probability were considered to find the best in terms of the balance between accuracy (as measured by the goodness of fit to the data) and precision (from having to estimate fewer parameters) of  $p$  and  $\phi$  estimates. Models that allowed fully independent  $\hat{p}$  among populations were not considered for two reasons: (i) detection probabilities were assumed to be based on characteristics of tags and subarrays, not on population-specific

behaviors; and (ii) as many populations had few tags detected at some subarrays, we wanted to avoid over-fitting to these sparse data. Estimates of  $p$  were independent among subarrays and years in all models, but the remaining components of the  $p$  submodels were incorporated as additive effects. Model selection methods were used to compare candidate models (20). Models with lower QAICc values (i.e., AIC values adjusted for small sample sizes and extrabinomial variation) are considered better in the balance of goodness of fit and the number of parameters required to achieve that fit.

Of the 20  $p$  submodels evaluated for the Fraser River population dataset, the strongest support was found in the submodel that involved tag type, two river level covariates, and parameters allowing for split-route flexibility after ocean entry. This model, with the greatest number of parameters of all models considered, had an Akaike weight of 0.997, so was clearly the best model within the model set (Table S3). The second- and third-best models, with  $\Delta\text{QAICc}$  values of 12.0 and 16.3, were similar to the first but did not involve a tag type effect or a second river level covariate, respectively. The remaining models had essentially no support within the model set. The top four models all involved the flexibility of population-specific  $\hat{p}_{\text{NSOG}}$  (which are actually joint estimates of detection and northward movement probabilities) in populations that exhibited split-route migration patterns after entering the Salish Sea. An extra 11 parameters were required to allow this flexibility, but the fit improved substantially, with a difference in  $\Delta\text{QAICc}$  of approximately 24 to 27 between models with and without these split-route parameters. The second strongest effect on  $p$  appeared to be the incorporation of a second flow covariate corresponding with the mean arrival time of a population at a detection subarray. The top 16 submodels all involved at least one flow or DOY covariate (the bottom four did not), outlining the importance of incorporating seasonal decreases in  $p$  among populations as a result of increasing river flows over the salmon migration season (e.g., Fig. S1). This trend is only apparent by analyzing multiple populations with a wide range of release times or outmigration periods in the same river system. The top two models involved two covariates, giving greater flexibility for quantifying the relationship with flow. Tag type also had an important effect on  $p$ , with all 10 of the models that incorporated the extra parameter having lower QAICc values than their corresponding models that did not. The model coefficient (i.e., logit-link  $\beta$  parameter) for the tag type parameter in the top model was  $>0$  (0.88; 95% confidence limits, 0.50–1.27), suggesting that V9 tags were more likely to be detected than V7 tags on average, as expected on the basis of their higher acoustic output. This constant difference among tag types on the logit scale becomes a variable difference on the probability scale, dependent on the magnitude of  $p$  (Fig. S2).

Of the four submodels of  $p$  evaluated for the non-Fraser River dataset, the strongest support was again seen in the largest model within this model set, incorporating effects of tag type and parameters allowing for split-route flexibility after entry into the Salish Sea (Table S4). Tag type appeared to have a very strong effect: the two models that incorporated the extra parameter had QAICc values approximately 21 to 24 smaller than the two models without tag type considered. The model coefficient was  $>0$  (0.71; 95% confidence limit, 0.46–0.97), again with  $\hat{p}$  higher for V9 tags than for V7 tags. Incorporating the flexibility of population-specific  $\hat{p}_{\text{NSOG}}$  caused by split-route migration patterns required 10 parameters, and the associated reduction in the model's likelihood was sufficient to make this the better model ( $\Delta\text{QAICc} = 2.8$ ) when tag type was also incorporated.

- Chittenden C, et al. (2008) Riverine, estuarine and marine migratory behaviour and physiology of wild and hatchery-reared coho salmon (*Oncorhynchus kisutch*) smolts descending the Campbell River, BC. *J Fish Biol* 72:614–628.
- Rechisky EL, Welch DW (2010) Surgical implantation of acoustic tags: Influence of tag loss and tag-induced mortality on free-ranging and hatchery-held spring Chinook (*O. tshawytscha*) smolts. *PNAMP Special Publication: Tagging, Telemetry and Marking Measures for Monitoring Fish Populations. A Compendium of New and Recent Science for Use in Informing Technique and Decision Modalities. The Pacific Northwest Aquatic Monitoring Partnership: Special Publication 2010-002*, eds Wolf KS, O'Neal JS (Pacific Northwest Aquatic Monitoring Partnership, Vancouver, WA), pp 71–96.
- Welch DW, Batten SD, Ward BR (2007) Growth, survival, and rates of tag retention for surgically implanted acoustic tags in steelhead trout (*O. mykiss*). *Hydrobiologia* 582: 289–299.
- Welch DW, et al. (2008) Survival of migrating salmon smolts in large rivers with and without dams. *PLoS Biol* 6:e265.
- Melnichuk MC, Welch DW, Walters CJ, Christensen V (2007) Riverine and early ocean migration and mortality patterns of juvenile steelhead trout (*Oncorhynchus mykiss*) from the Cheakamus River, British Columbia. *Hydrobiologia* 582:55–65.
- Welch DW, Boehlert GW, Ward BR (2003) POST-the Pacific Ocean Salmon Tracking project. *Oceanol Acta* 25:243–253.
- Welch DW, Turo S, Batten SD (2006) Large-scale marine and freshwater movements of white sturgeon (*Acipenser transmontanus*). *Trans Am Fish Soc* 135:386–389.
- Welch DW, Ward BR, Batten SD (2004) Early ocean survival and marine movements of hatchery and wild steelhead trout (*Oncorhynchus mykiss*) determined by an acoustic array: Queen Charlotte Strait, British Columbia. *Deep Sea Res Part II Top Stud Oceanogr* 51:897–909.
- Cormack R (1964) Estimates of survival from the sighting of marked animals. *Biometrika* 51:429–438.
- Jolly GM (1965) Explicit estimates from capture-recapture data with both death and immigration-stochastic model. *Biometrika* 52:225–247.
- Seber GAF (1965) A note on the multiple recapture census. *Biometrika* 52:249–259.
- Burnham KP, Anderson DR, White GC, Brownie C, Pollock KH (1987) *Design and Analysis Methods for Fish Survival Experiments Based on Release-Recapture* (American Fisheries Society, Bethesda, MD) Vol 5.
- Skalski JR, et al. (2001) Estimating in-river survival of migrating salmonid smolts using radiotelemetry. *Can J Fish Aquat Sci* 58:1987–1997.
- Zabel RW, Achord S (2004) Relating size of juveniles to survival within and among populations of chinook salmon. *Ecology* 85:795–806.
- Lebreton JD, Burnham KP, Clobert J, Anderson DR (1992) Modeling survival and testing biological hypotheses using marked animals: A unified approach with case studies. *Ecol Monogr* 62:67–118.
- Melnichuk MC (2009) Estimation of survival and detection probabilities for multiple tagged salmon stocks with nested migration routes, using a large-scale telemetry array. *Mar Freshw Res* 60:1231–1243.
- White GC, Burnham KP (1999) Program MARK: Survival estimation from populations of marked animals. *Bird Study* 46(suppl):120–139.
- Laake J, Rexstad E (2009) RMark - an alternative approach to building linear models in MARK (Appendix C). *Program MARK: A Gentle Introduction*, eds Cooch E, White G (MARK, Fort Collins, CO), 7th Ed, pp C1–C109.
- Pollock KH, Nichols JD, Brownie C, Hines JE (1990) Statistical inference for capture-recapture experiments. *Wildl Monogr* 107:1–97.
- Burnham KP, Anderson DR (2002) *Model Selection and Multi-Model Inference: A Practical Information-Theoretic Approach* (Springer-Verlag, New York), 2nd Ed.
- Skalski JR (2006) Evaluation and recommendations on alternative hydroacoustic array deployments for the mouth of the Columbia River to provide estimates of salmonid smolt survival and movements. *Report no. DOE/BP-00025091-1: The Design and Analysis of Salmonid Tagging Studies in the Columbia Basin* (US Department of Energy, Washington, DC) Vol. 20.

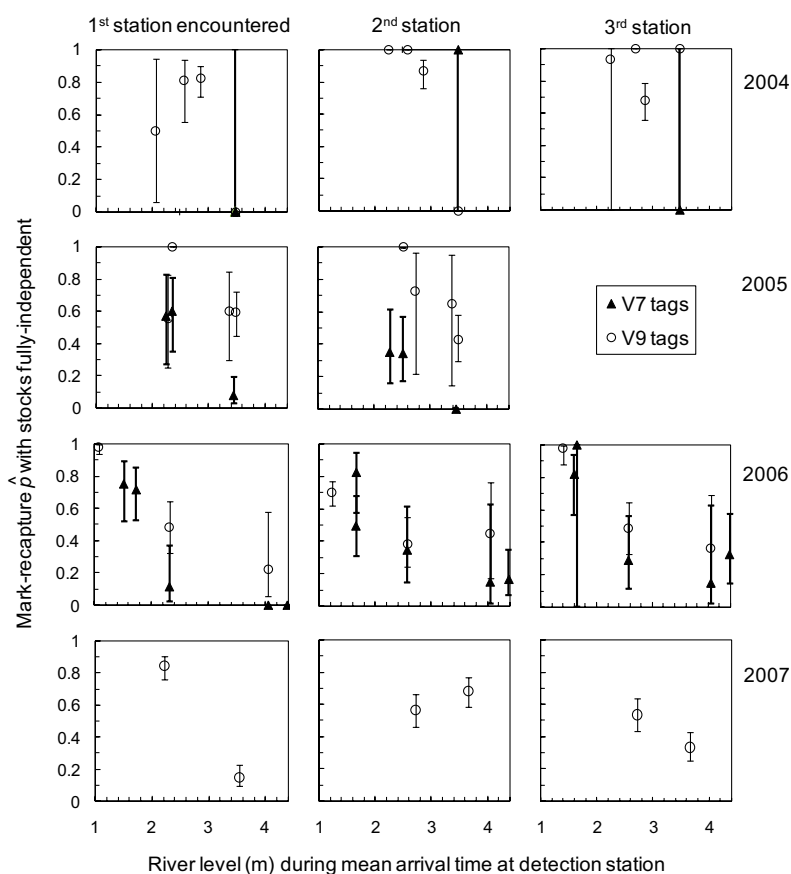

**Fig. S1.** Population-specific detection probability estimates ( $\hat{p}$ ) at Fraser River subarrays versus river level at the mean arrival time of a population at a detection subarray. Survival and detection probability submodels are fully independent among release groups and segments/subarrays in the model assumed; tag types are also fully independent in terms of  $\hat{p}$  ( $\hat{p}_{\text{Segment:Group}}, \hat{p}_{\text{Station:Group:TagType}}$ ). Error bars show 95% confidence intervals and are thick for V7 tags and thin for V9 tags. River levels were measured at the Mission gauge by Environment Canada.



**Table S1. Provenance of the 3,692 tagged salmon juveniles used in this study**

| Map code | Species   | Population        | H/W | Tag type | Number released |      |      |      |
|----------|-----------|-------------------|-----|----------|-----------------|------|------|------|
|          |           |                   |     |          | 2004            | 2005 | 2006 | 2007 |
| A        | Coho      | Keogh river       | W   | V9       | 107             | 49   | 50   | —    |
| A        | Steelhead | Keogh river       | H   | V9       | 92              | 50   | —    | —    |
| A        | Steelhead | Keogh river       | W   | V9       | 78              | —    | 50   | —    |
| B        | Chinook   | Nimpkish river    | U   | V7       | —               | —    | 50   | —    |
| C        | Coho      | Nimpkish river    | H   | V9       | 99              | 8    | —    | —    |
| C        | Coho      | Nimpkish river    | H   | V7       | —               | 49   | —    | —    |
| C        | Coho      | Nimpkish river    | W   | V9       | —               | —    | 50   | —    |
| D        | Steelhead | Englishman river* | W   | V9       | 67              | 43   | 50   | —    |
| E        | Steelhead | Cowichan river*   | H   | V9       | —               | —    | 50   | —    |
| F        | Kokanee   | Sakinaw lake*     | W   | V9       | —               | 47   | 49   | —    |
| F        | Sockeye   | Sakinaw lake*     | H   | V9       | 97              | —    | 61   | —    |
| G        | Coho      | Tenderfoot creek* | H   | V9       | 100             | 50   | 50   | —    |
| G        | Coho      | Tenderfoot creek* | H   | V7       | —               | 50   | 70   | 199  |
| G        | Steelhead | Cheakamus river*  | H   | V9       | —               | —    | —    | 81   |
| G        | Steelhead | Cheakamus river*  | W   | V9       | 51              | 49   | —    | —    |
| H        | Steelhead | Seymour river*    | H   | V9       | —               | —    | —    | 60   |
| I        | Sockeye   | Cultus lake*      | H   | V9       | 100             | 376  | 200  | 200  |
| J        | Steelhead | Deadman river*    | W   | V9       | —               | 57   | 38   | —    |
| J        | Steelhead | Deadman river*    | W   | V7       | —               | —    | 26   | —    |
| K        | Chinook   | Nicola river*     | H   | V9       | 49              | —    | —    | —    |
| K        | Chinook   | Nicola river*     | H   | V7       | —               | 50   | —    | —    |
| L        | Chinook   | Coldwater river   | U   | V9       | —               | 19   | —    | —    |
| L        | Chinook   | Coldwater river*  | U   | V7       | —               | 50   | —    | —    |
| L        | Steelhead | Coldwater river*  | W   | V9       | 31              | 50   | 50   | —    |
| L        | Steelhead | Coldwater river*  | W   | V7       | —               | —    | 25   | —    |
| M        | Chinook   | Spius creek*      | H   | V7       | —               | —    | 99   | —    |
| N        | Coho      | Spius creek*      | H   | V7       | —               | 50   | —    | —    |
| O        | Chinook   | Coldwater river*  | H   | V7       | —               | —    | 100  | —    |
| O        | Coho      | Coldwater river   | H   | V9       | 28              | —    | —    | —    |
| O        | Coho      | Coldwater river*  | H   | V7       | 12              | —    | 100  | —    |

Map release locations are shown in Fig. 1. The average size of the juveniles tagged in a given release group and year was generally  $\geq 125$  mm for V7 tags ( $\geq 130$  mm in 2006–2007) and  $\geq 140$  mm for V9 tags. Origin: H, hatchery-reared fish; W, wild-caught and lacking hatchery marks; U, unknown. Kokanee are a land-locked sockeye life history type; it was discovered from DNA analysis after tagging of wild Sakinaw Lake sockeye smolts captured in the lake and released directly into the ocean that they were kokanee and not the sea-run sockeye life history type; Sakinaw hatchery smolts were all sockeye life history type (1).

\*Population used in the assessment of size-related mortality (Fig. 5); stocks with release points close to the final telemetry subarrays were excluded as relatively little mortality could occur.

1. Wood CC, Welch DW, Godbout L, Cameron J (2011) Marine migratory behaviour of hatchery-reared anadromous and wild non-anadromous sockeye salmon revealed by acoustic tags. *Advances in Fish Tagging and Marking Technology*, eds McKenzie J, Phelps Q, Kopf R, Mesa M, Parsons B, Seitz A (American Fisheries Society, Symposium 76, Bethesda, MD).

**Table S2. Comparison of detection probability models for isolated estimation of  $p$  on Howe Sound and NSOG lines**

| Detection probability model*                                 | $k^\dagger$ | $-2 \cdot \ln(L)$ | AICc    | $\Delta AICc$ |
|--------------------------------------------------------------|-------------|-------------------|---------|---------------|
| <b>Howe Sound dataset</b>                                    |             |                   |         |               |
| $P_{Station} \times Year + TagType$                          | 43          | 1,645.4           | 1,734.7 | 0             |
| $P_{Station} \times Year$                                    | 42          | 1,657.1           | 1,744.3 | 9.6           |
| $P_{Station} \times (Year : Species : Population) + TagType$ | 58          | 1,636.7           | 1,758.8 | 24.1          |
| $P_{Station} \times (Group : TagType)$                       | 60          | 1,632.8           | 1,759.4 | 24.7          |
| $P_{Station} \times (Year : Species : Population)$           | 57          | 1,644.8           | 1,764.8 | 30.1          |
| <b>NSOG dataset</b>                                          |             |                   |         |               |
| $P_{Station} \times Year$                                    | 104         | 3,434.6           | 3,648.3 | 0             |
| $P_{Station} \times Year + TagType$                          | 105         | 3,434.4           | 3,650.2 | 1.9           |
| $P_{Station} \times (Year : Species : Population) + TagType$ | 181         | 3,404.1           | 3,783.5 | 135.3         |
| $P_{Station} \times (Year : Species : Population)$           | 180         | 3,407.1           | 3,784.3 | 136.0         |
| $P_{Station} \times (Group : TagType)$                       | 192         | 3,404.1           | 3,807.8 | 159.5         |

\*The survival probability model assumed was  $\phi_{Segment} \times (Group:TagType)$

$^\dagger$ The parameter count ( $k$ ) is adjusted to include the number of potentially estimated parameters including those at boundaries of 0 or 1. Detection probabilities at the final detection station were fixed at estimated values from isolated analyses (see text) so are not included in the parameter count.



**Table S3. Model selection results for recaptures-only survival ( $\phi$ ) and detection probability ( $p$ ) estimates for Fraser River populations in years 2004–2007**

| Detection probability model*                                                                                          | $k^\dagger$ | $-2 \cdot \ln(L)$ | QAICc   | $\Delta$ QAICc | Akaike weight |
|-----------------------------------------------------------------------------------------------------------------------|-------------|-------------------|---------|----------------|---------------|
| $p_{\text{Station:Year} + \text{TagType} + \text{Mission} + \text{partial\_PM} + \text{Split\_Route\_Pars}}^\ddagger$ | 118         | 5,734.7           | 4,340.5 | 0.0            | 1.00          |
| $p_{\text{Station:Year} + \text{Mission} + \text{partial\_PM} + \text{Split\_Route\_Pars}}$                           | 117         | 5,754.5           | 4,352.5 | 12.0           | 0.00          |
| $p_{\text{Station:Year} + \text{TagType} + \text{Mission} + \text{Split\_Route\_Pars}}$                               | 117         | 5,760.6           | 4,356.8 | 16.3           | 0.00          |
| $p_{\text{Station:Year} + \text{Mission} + \text{Split\_Route\_Pars}}$                                                | 116         | 5,772.6           | 4,363.3 | 22.8           | 0.00          |
| $p_{\text{Station:Year} + \text{TagType} + \text{Mission} + \text{partial\_PM}}$                                      | 107         | 5,802.1           | 4,365.1 | 24.6           | 0.00          |
| $p_{\text{Station:Year} + \text{TagType} + \text{PM} + \text{Split\_Route\_Pars}}$                                    | 117         | 5,783.3           | 4,373.1 | 32.6           | 0.00          |
| $p_{\text{Station:Year} + \text{PM} + \text{Split\_Route\_Pars}}$                                                     | 116         | 5,789.8           | 4,375.6 | 35.1           | 0.00          |
| $p_{\text{Station:Year} + \text{Mission} + \text{partial\_PM}}$                                                       | 106         | 5,824.4           | 4,379.0 | 38.5           | 0.00          |
| $p_{\text{Station:Year} + \text{TagType} + \text{DOY} + \text{Split\_Route\_Pars}}$                                   | 117         | 5,794.7           | 4,381.2 | 40.7           | 0.00          |
| $p_{\text{Station:Year} + \text{TagType} + \text{Mission}}$                                                           | 106         | 5,828.9           | 4,382.2 | 41.7           | 0.00          |
| $p_{\text{Station:Year} + \text{Mission}}$                                                                            | 105         | 5,842.7           | 4,389.9 | 49.4           | 0.00          |
| $p_{\text{Station:Year} + \text{DOY} + \text{Split\_Route\_Pars}}$                                                    | 116         | 5,814.7           | 4,393.4 | 52.9           | 0.00          |
| $p_{\text{Station:Year} + \text{TagType} + \text{PM}}$                                                                | 106         | 5,852.2           | 4,398.8 | 58.3           | 0.00          |
| $p_{\text{Station:Year} + \text{PM}}$                                                                                 | 105         | 5,860.0           | 4,402.2 | 61.7           | 0.00          |
| $p_{\text{Station:Year} + \text{TagType} + \text{DOY}}$                                                               | 106         | 5,862.5           | 4,406.2 | 65.7           | 0.00          |
| $p_{\text{Station:Year} + \text{DOY}}$                                                                                | 105         | 5,884.8           | 4,420.0 | 79.5           | 0.00          |
| $p_{\text{Station:Year} + \text{TagType} + \text{Split\_Route\_Pars}}$                                                | 116         | 5,956.1           | 4,494.4 | 153.9          | 0.00          |
| $p_{\text{Station:Year} + \text{TagType}}$                                                                            | 105         | 6,022.4           | 4,518.3 | 177.8          | 0.00          |
| $p_{\text{Station:Year} + \text{Split\_Route\_Pars}}$                                                                 | 115         | 6,008.5           | 4,529.6 | 189.1          | 0.00          |
| $p_{\text{Station:Year}}$                                                                                             | 104         | 6,077.9           | 4,555.8 | 215.3          | 0.00          |

QAICc values are adjusted for small sample sizes and extrabinomial variation with  $\hat{c}=1.40$ .

\*Models for  $p$  are compared whereas the fully segment and group-varying submodel for  $\phi$  with interactions only is held constant,  $\phi_{\text{Segment:Group}}$ . Groups consist of unique combinations of species, population, provenance, and year.

<sup>†</sup>The parameter count ( $k$ ) is adjusted to include the number of potentially estimated parameters including those at boundaries of 0 or 1. Detection probabilities at the final detection station were fixed at estimated values from isolated analyses (see text) so are not included in the parameter count.

<sup>‡</sup>DOY, water level at Mission, and water level at Port Mann (PM) represent run timing or river level covariates used to constrain  $p$  estimates. In models where multiple covariates were used (...Mission + partial\_PM...), water level at the Mission gauge applied to all river stations whereas water level at the Port Mann gauge applied to all stations downstream of Mission. Additional parameters for detection probability at NSOG ("Split\_Route\_Pars") were used for populations that exhibited split-route migration patterns after ocean entry.

**Table S4. Model selection results for recaptures-only survival ( $\phi$ ) and detection probability ( $p$ ) estimates for all populations outside the Fraser River in years 2004–2007**

| Detection probability model*                                                                           | $k^\dagger$ | $-2 \cdot \ln(L)$ | QAICc   | $\Delta$ QAICc | Akaike weight |
|--------------------------------------------------------------------------------------------------------|-------------|-------------------|---------|----------------|---------------|
| $p_{\text{Station:Year} + \text{TagType} + \text{Split\_Route\_Pars} + \text{Cluster\_Pars}}^\ddagger$ | 202         | 7,618.1           | 6,865.7 | 0.0            | 0.80          |
| $p_{\text{Station:Year} + \text{TagType} + \text{Cluster\_Pars}}$                                      | 192         | 7,589.4           | 6,868.5 | 2.8            | 0.20          |
| $p_{\text{Station:Year} + \text{Split\_Route\_Pars} + \text{Cluster\_Pars}}$                           | 201         | 7,645.9           | 6,889.3 | 23.6           | 0.00          |
| $p_{\text{Station:Year} + \text{Cluster\_Pars}}$                                                       | 191         | 7,619.8           | 6,889.9 | 24.3           | 0.00          |

QAICc values are adjusted for small sample sizes and extrabinomial variation with  $\hat{c}=1.177$ .

\*Models for  $p$  are compared whereas the fully segment and group-varying submodel for  $\phi$  with interactions only is held constant,  $\phi_{\text{Segment:Group}}$ . Groups consist of unique combinations of species, population, provenance, and year.

<sup>†</sup>The parameter count ( $k$ ) is adjusted to include the number of potentially estimated parameters including those at boundaries of 0 or 1. Detection probabilities at the final detection station were fixed at estimated values from isolated analyses (see text) so are not included in the parameter count.

<sup>‡</sup>Additional parameters for detection probability at NSOG ("Split\_Route\_Pars") were used for populations that exhibited split-route migration patterns after ocean entry. Additional parameters ("Cluster\_Pars") were used in all models which ensured that populations sharing a detection station along migration routes were grouped at their  $n$ th detection history digit, and were separated from other populations that crossed a different station at their  $n$ th digit.



## 2007-09 Cultus Sockeye

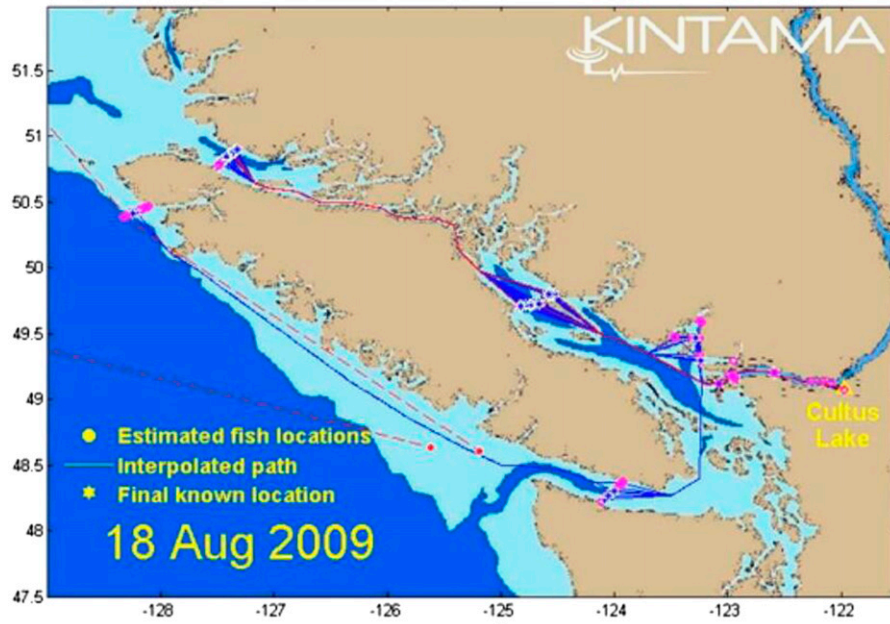

**Movie S3.** Animation of movements for the 2007 Cultus Lake sockeye smolt outmigrant and the return path of the two smolts surviving to return as adults in 2009 (red dots).

[Movie S3](#)
